# Supplementary material for: Bis-imidazolium based poly(phenylene oxide) anion exchange membranes for fuel cells: the effect of cross-linking
Source: Royal Society of Chemistry journal article supplement (doi:10.1039/c9ta00028c), 2019-01-01
Supplement: c9ta00028c1.pdf [file c9ta00028c1.pdf]

## Bis-imidazolium based poly(phenylene oxide) anion exchange membranes for fuel cells: the effect of cross-linking

Bencai Lin<sup>\*,†</sup>, Fei Xu<sup>†</sup>, Fuqiang Chu<sup>†</sup>, Yurong Ren<sup>†</sup>, Jianning Ding<sup>†</sup>, Feng Yan<sup>\*,‡</sup>

<sup>†</sup>Jiangsu Key Laboratory of Environmentally Friendly Polymeric Materials, School of Materials Science and Engineering, Jiangsu Collaborative Innovation Center of Photovoltaic Science and Engineering, Changzhou University, Changzhou, Jiangsu, 213164, P.R. China

<sup>‡</sup>Department of Polymer Science and Engineering College of Chemistry, Chemical Engineering and Materials Science Soochow University, Suzhou, 215123 (P. R. China)

\*E-mail: linbencai@cczu.edu.cn (Bencai Lin); fyan@suda.edu.cn (Feng Yan)

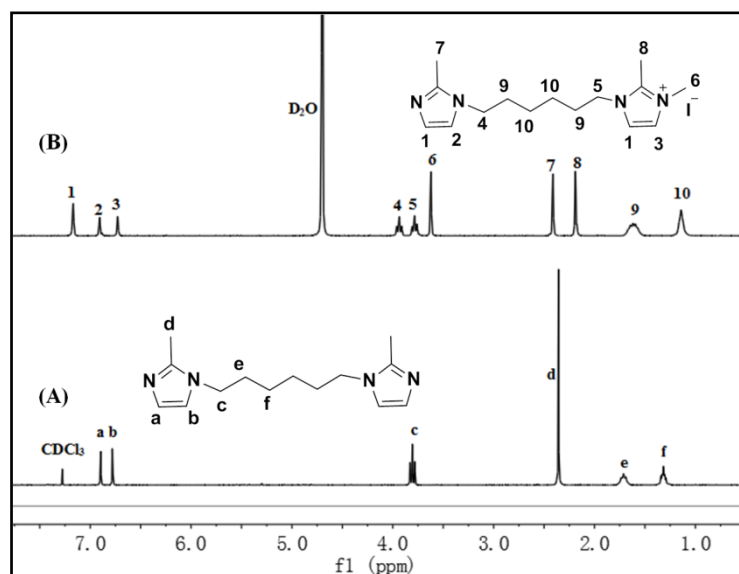

**Figure S1.** <sup>1</sup>H NMR spectra of 1, 6-bis(2-methylimidazol-1-yl) hexane (A) and 2, 3-dimethyl-1-(6-(2-methylimidazol-1-yl)hexyl)-imidazolium iodide (B).

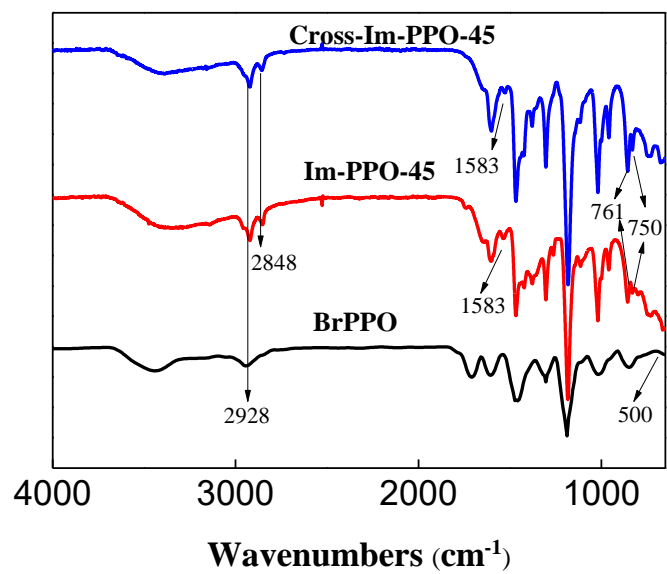

**Figure S2.** FT-IR spectra of BrPPO, Im-PPO-45 and cross-Im-PPO-45.

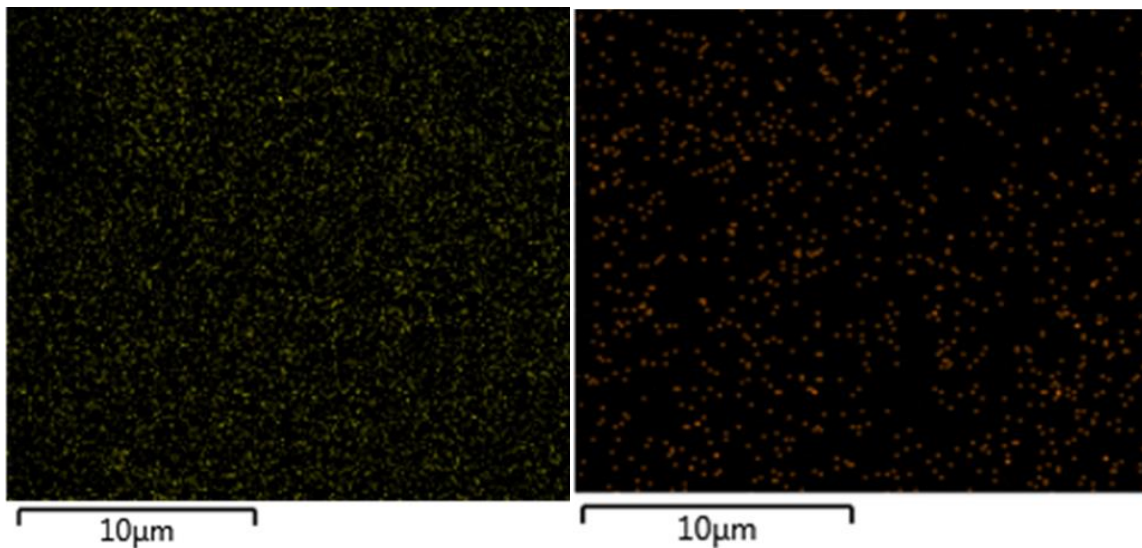

**Figure S3.** Distribution of nitrogen elements in the Im-PPO-45 (A) and Cross-Im-PPO-45 (B), as obtained by using SEM and EDS mapping.

**Table S1.** The degradation of PPO-based membranes in Fenton's reagent (4 ppm Fe<sup>2+</sup> and 3 % H<sub>2</sub>O<sub>2</sub>)

at 60 °C for 120 h.

| Membranes       | Loss weight (%) |
|-----------------|-----------------|
| Im-PPO-25       | 19.27           |
| Im-PPO-35       | 28.18           |
| Im-PPO-45       | 39.44           |
| Cross-Im-PPO-45 | 12.86           |
| Cross-Im-PPO-60 | 16.05           |
| Cross-Im-PPO-75 | 20.13           |
